# Supplementary material for: Exendin‐4, a GLP‐1 receptor agonist regulates retinal capillary tone and restores microvascular patency after ischaemia–reperfusion injury
Source: PubMed Central journal article supplement (PMC7348095; doi:10.1111/bph.15059), 2020-05-27
Supplement: BPH-177-3389-s001.pdf [file BPH-177-3389-s001.pdf]

1 Supplementary figure 1

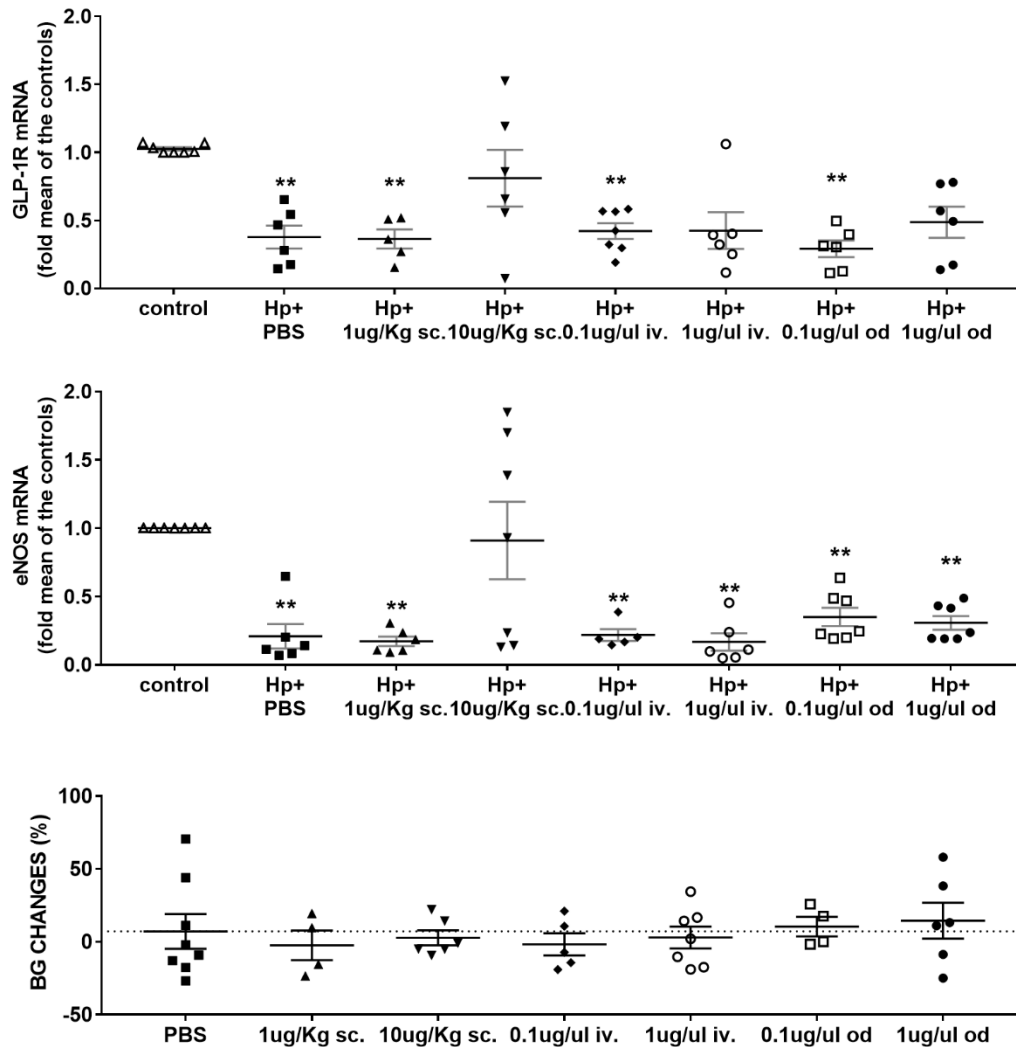

2

3 Effect of the administration of exendin-4 on the mRNA of GLP-1R (A) and eNOS (B), and the blood  
 4 glucose level (C). HP, high pressure injury group. EX-4, exendin-4. sc, subcutaneous injection of  
 5 exendin-4. iv, intravitreal injection of exendin-4. od, eye drops of exendin-4. A, one-way ANOVA  
 6 with LSD or Dunnett's T3 test was performed (n = 7 in control group and Hp+0.1μg/μl iv. group; n =  
 7 6 in Hp+ PBS group, Hp+10μg/Kg sc. group, Hp+1μg/μl iv. group, Hp+0.1μg/μl od group, and  
 8 Hp+1μg/μl od group; and n = 5 in Hp+1μg/Kg sc. group). B, one-way ANOVA with LSD or  
 9 Dunnett's T3 test was performed (n = 7 in control group, Hp+10μg/Kg sc. group, Hp+0.1μg/μl od  
 10 group, and Hp+1μg/μl od group; n = 6 in Hp+ PBS group, Hp+1μg/Kg sc. group, and Hp+1μg/μl iv.  
 11 group; and n = 5 in Hp+0.1μg/μl iv. group). C, the dotted line was at 7.14% which was the mean  
 12 value in control group (PBS group). Student's t-test was performed (n = 8 in PBS group; n = 7 in  
 13 1μg/μl iv. group; n = 6 in 10μg/Kg sc. group and 1μg/μl od group; n = 5 in 0.1μg/μl iv. group; and n

14 = 4 in 1 $\mu$ g/Kg sc. group and 0.1 $\mu$ g/ $\mu$ l od group). \* p < 0.05, versus CSF group; # p < 0.05, versus  
15 PBS group.

16

17

18 Supplementary figure 2

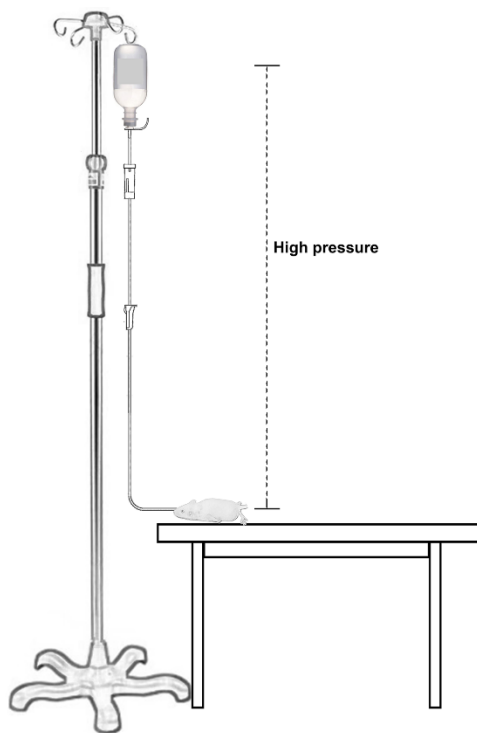

19

20 A schematic diagram of the ischemia-reperfusion model.

21

22 Supplementary method 1

23 Quantitative PCR

24 Total RNA of retina or HRPCs was extracted using the RNeasy Mini Kit (QIAGEN, Netherlands) and  
25 quantified with a spectrophotometer (NanoDrop, Thermo Scientific; Waltham, MA, USA).  
26 Complementary DNA (cDNA) was generated from total RNA through reverse transcription (TAKARA,  
27 Japan). Quantitative real-time (qRT)-PCR were performed using specific primers (Shengong, Shanghai,  
28 China) for eNOS (CACAGGCATCACCAGGAAGAAGAC and TTCACACGCTTCGCCATCACC,  
29 forward and reverse, respectively) and 4 pairs of GLP-1R primers ( supplementary Table 1) with a  
30 fluorescence quantitative kit (Applied Biosystems; Foster City, CA, USA).  $\beta$ -actin was used as a  
31 housekeeping gene.

32 Supplementary Table 1 Primers for RT-PCR assay

| Primer    | Forward (5'→3')           | Reverse (3'→5')        |
|-----------|---------------------------|------------------------|
| h-GLP1R-1 | gaccttgatgaatacgctg       | tcctcgactccgacaagt     |
| h-GLP1R-2 | gtcaagtacctctatgaggacgagg | atgagtgtcagcgtggacttg  |
| h-GLP1R-3 | tggcggccaattactactg       | gagccagtagttcatgttggga |
| h-GLP1R-4 | agtccaagcgaggggaaaga      | gaggcgataaccagagcagag  |

33

34 Supplementary method 2

35 Measurement of blood glucose concentration

36 In the I/R experiments, blood glucose levels were examined prior to exendin-4 or vehicle administration  
37 and after ischemia (ACCU-CHEK Active, Roche; Ireland).

38
